# Supplementary material for: Phytochemical Analysis, Biological Activities, and Molecular Docking Studies of Root Extracts from Paeonia Species in Serbia
Source: MDPI journal article supplement (doi:10.3390/ph17040518), 2024-04-17
Supplement: s1 [file s1]

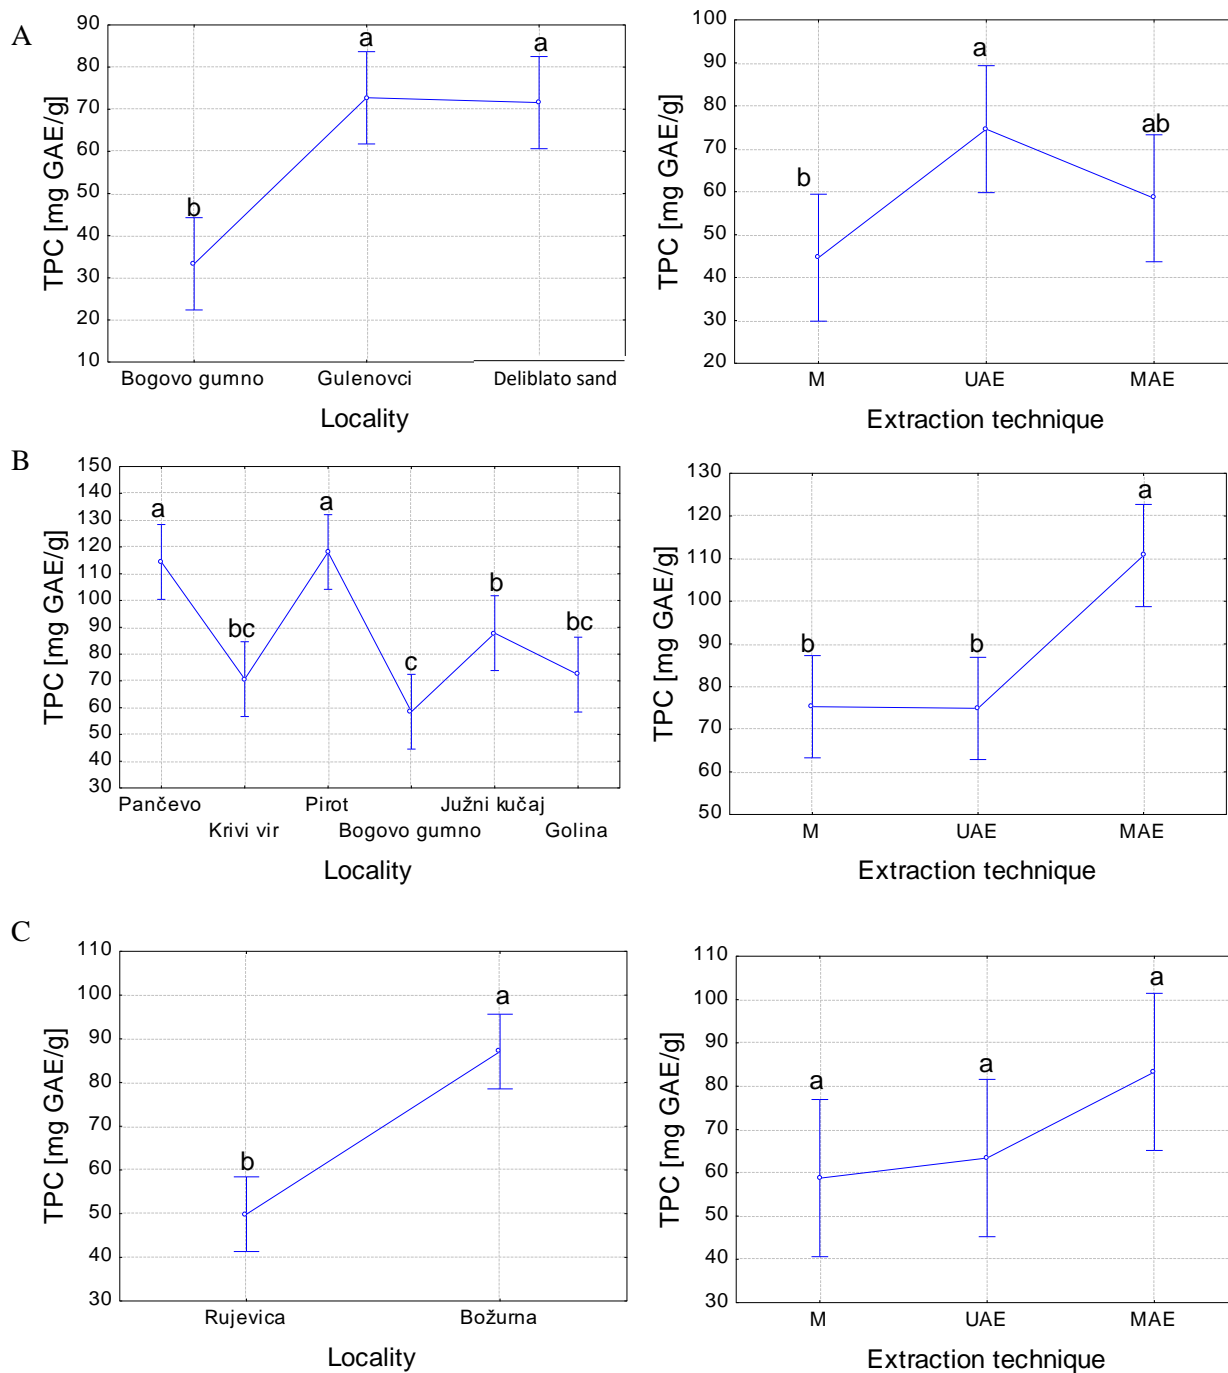

**Figure S1.** Preliminary screening of factor level's impact (locality and extraction procedure) on the total polyphenolic concentration (TPC) of *Paeonia tenuifolia* L. **(A)**, *Paeonia peregrina* Mill. **(B)**, and *Paeonia officinalis* L. **(C)** root extracts; GAE, gallic acid equivalents; MAE, microwave-assisted extraction; UAE, ultrasound-assisted extraction; M, maceration; values with different letters showed statistically significant difference (analysis of variance - one way ANOVA followed by Duncan's *post hoc* test,  $p < 0.05$ ;  $n = 3$ ).

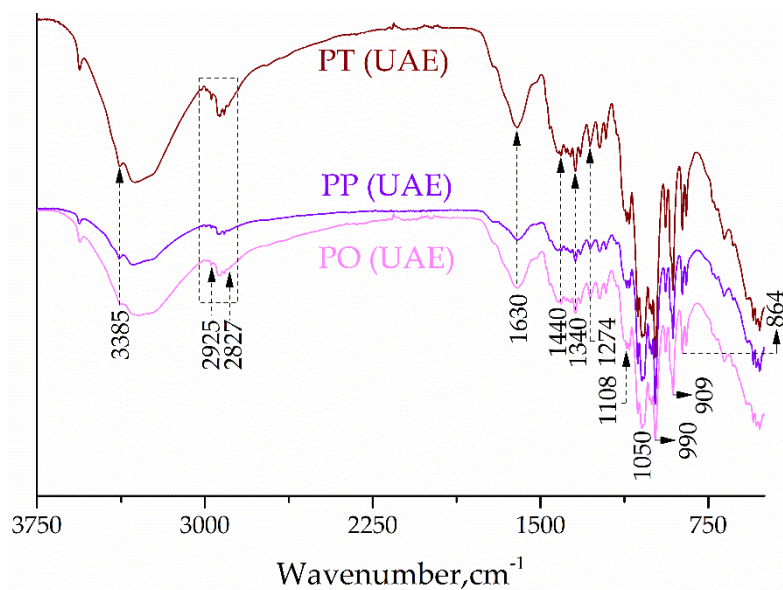

**Figure S2.** ATR-FTIR spectra of the root extracts of *Paeonia tenuifolia* L. (PT), *Paeonia peregrina* Mill. (PP), and *Paeonia officinalis* L. (PO); UAE – ultrasound-assisted extraction

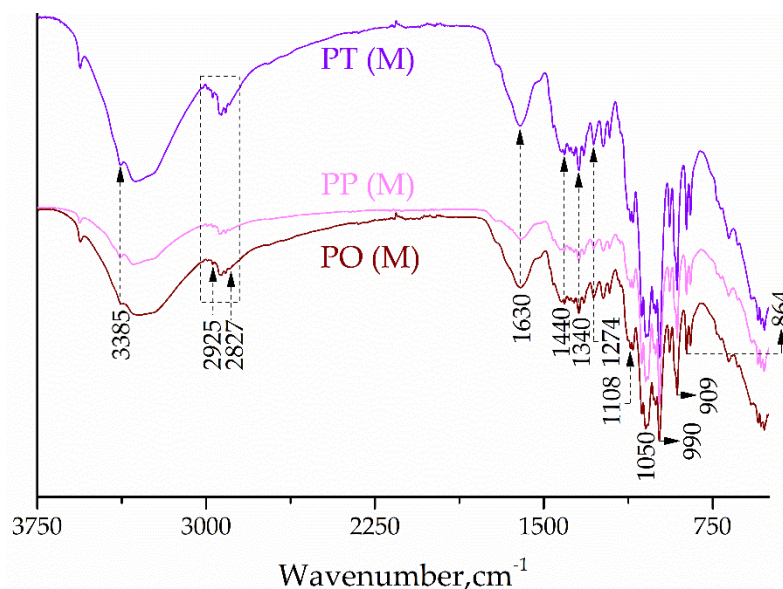

**Figure S3.** ATR-FTIR spectra of the root extracts of *Paeonia tenuifolia* L. (PT), *Paeonia peregrina* Mill. (PP), and *Paeonia officinalis* L. (PO); M – maceration

**Table S1.** Full factorial design for screening of factors' influence on total polyphenolic concentration (TPC) of root extracts of *Paeonia tenuifolia* L., *Paeonia peregrina* Mill., and *Paeonia officinalis* L., with the measured and predicted values.

| Species                        | Locality              | Extraction<br>procedure | TPC<br>[mg GAE*/mL] |                  |
|--------------------------------|-----------------------|-------------------------|---------------------|------------------|
|                                |                       |                         | Measured            | Predicted        |
| <i>Paeonia tenuifolia</i> L.   | Gulenovci             | MAE                     | 77.2±2.6            | 76.8±2.1         |
|                                | Gulenovci             | UAE                     | 87.9±1.4            | 87.7±2.1         |
|                                | Deliblato             | MAE                     | 67.6±0.7            | 67.5±2.0         |
|                                | <b>Deliblato sand</b> | <b>UAE</b>              | <b>99.6±0.2</b>     | <b>99.6±1.9</b>  |
| <i>Paeonia peregrina</i> Mill. | <b>Pirot</b>          | <b>MAE</b>              | <b>161.2±2.2</b>    | <b>161.1±3.5</b> |
|                                | Pirot                 | M                       | 99.9±1.8            | 99.7±3.2         |
|                                | Pančevo               | MAE                     | 143.7±2.6           | 143.2±3.1        |
|                                | Pančevo               | M                       | 91.1±2.6            | 90.9±3.4         |
| <i>Paeonia officinalis</i> L.  | Rujevica              | MAE                     | 65.6±1.0            | 65.5±2.1         |
|                                | Rujevica              | M                       | 35.0±1.5            | 35.0±1.9         |
|                                | <b>Božurna</b>        | <b>MAE</b>              | <b>101.2±2.8</b>    | <b>101.1±1.8</b> |
|                                | Božurna               | M                       | 82.6±1.6            | 82.5±2.0         |

\*GAE: gallic acid equivalent; Maceration (M); Microwave-assisted extraction (MAE); Ultrasound-assisted extraction (UAE)

**Table S2.** Characterisation of detected bioactive compounds in selected *Peonie* root teas before and after *in vitro* GID, using UHPLC-QToF-MS. Target compounds, expected retention time (RT), base peak, molecular formula, calculated mass, exact mass and MS<sup>2</sup> fragments are presented.

| No                                    | RT        | Compound name                 | Formula                                                      | Calculated mass | <i>m/z</i> exact mass | <i>m</i> Da | MS fragments                                                                                                                                                                                                          |
|---------------------------------------|-----------|-------------------------------|--------------------------------------------------------------|-----------------|-----------------------|-------------|-----------------------------------------------------------------------------------------------------------------------------------------------------------------------------------------------------------------------|
| <i>Phenolic acids and derivatives</i> |           |                               |                                                              |                 |                       |             |                                                                                                                                                                                                                       |
| <i>Gallic acid and derivatives</i>    |           |                               |                                                              |                 |                       |             |                                                                                                                                                                                                                       |
| 1                                     | 1.14      | Gallic acid                   | C <sub>7</sub> H <sub>5</sub> O <sub>5</sub> <sup>-</sup>    | 169.01370       | 169.01443             | -0.73       | 107.01391(12), 123.00844(12), 124.01635(76), <b>125.02413(100)</b> , 126.02718(8)                                                                                                                                     |
| 2                                     | 4.24      | Methyl gallate                | C <sub>8</sub> H <sub>7</sub> O <sub>5</sub> <sup>-</sup>    | 183.02930       | 183.02825             | 1.05        | 106.00613(4), 123.00874(4), <b>124.01629(100)</b> , 125.02(8)                                                                                                                                                         |
| 3                                     | 1.75      | Gallic acid derivative        | C <sub>10</sub> H <sub>11</sub> O <sub>7</sub> <sup>-</sup>  | 243.05050       | 243.05244             | -1.94       | 107.01344(9), 123.00887(8), <b>124.01625(100)</b> , 125.02312(29), 168.00758(2), <b>169.01439(9)</b>                                                                                                                  |
| 4                                     | 3.77      | Digallic acid isomer I        | C <sub>14</sub> H <sub>9</sub> O <sub>9</sub> <sup>-</sup>   | 321.02470       | 321.02654             | -1.84       | <b>125.02403(100)</b> , 126.02838(6), <b>169.01388(65)</b> , 170.01809(5)                                                                                                                                             |
| 5                                     | 5.59      | Digallic acid isomer II       | C <sub>14</sub> H <sub>9</sub> O <sub>9</sub> <sup>-</sup>   | 321.02470       | 321.02743             | -2.73       | <b>125.02427(100)</b> , 126.02755(8), <b>169.01395(65)</b> , 170.01726(6)                                                                                                                                             |
| 6                                     | 0.90      | Gallic acid hexoside          | C <sub>13</sub> H <sub>15</sub> O <sub>10</sub> <sup>-</sup> | 331.06650       | 331.06817             | -1.67       | 107.01397(6), 123.00845(6), <b>124.01598(33)</b> , <b>125.02385(65)</b> , 168.00629(20), <b>169.01409(100)</b>                                                                                                        |
| 7                                     | 8.02      | Methyl digallate              | C <sub>15</sub> H <sub>11</sub> O <sub>9</sub> <sup>-</sup>  | 335.04030       | 335.04267             | -2.37       | <b>124.01643(46)</b> , 125.02152(5), 168.00576(9), 169.01352(5), <b>183.03013(100)</b> , 184.03288(10), <b>335.11527(2)</b>                                                                                           |
| 8                                     | 1.75      | Methyl gallic acid hexoside   | C <sub>14</sub> H <sub>17</sub> O <sub>10</sub> <sup>-</sup> | 345.08220       | 345.08617             | -3.97       | 107.01447(30), 123.00877(60), 124.01631(44), <b>125.02357(46)</b> , 168.0063(27), <b>169.01243(53)</b> , <b>183.02919(100)</b>                                                                                        |
| 9                                     | 7.34      | Galloyl-vanilloyl-rhamoside   | C <sub>21</sub> H <sub>21</sub> O <sub>12</sub> <sup>-</sup> | 465.10330       | 465.10780             | -4.5        | <b>125.02435(100)</b> , 151.03506(6), <b>152.0114(25)</b> , 217.0503(13), 259.06067(24), 275.05562(26), 285.04029(44), 437.11006(24), 465.10427(10)                                                                   |
| 10                                    | 1.00      | Gallic acid dihexoside        | C <sub>19</sub> H <sub>25</sub> O <sub>15</sub> <sup>-</sup> | 493.11930       | 493.12260             | -3.30       | 125.02384(18), 151.00411(18), <b>169.01422(95)</b> , 170.01728(9), 211.02467(8), 223.02426(8), 241.0353(11), 271.04636(31), 283.04582(33), <b>313.0571(100)</b> , 314.06049(17), <b>331.06745(13)</b> , 493.12092(43) |
| 11                                    | 5.93      | Galloyl-HHDP-hexose isomer II | C <sub>27</sub> H <sub>21</sub> O <sub>18</sub> <sup>-</sup> | 633.07280       | 633.07382             | -1.02       | 169.01383(6), 275.01953(14), <b>300.99944(100)</b> , 302.00219(18), 303.00463(3), 313.05586(2), 463.05151(9), 483.07984(2), 633.07382(38)                                                                             |
| 12                                    | 2.89      | Galloyl-HHDP-hexose isomer I  | C <sub>27</sub> H <sub>21</sub> O <sub>18</sub> <sup>-</sup> | 633.07280       | 633.07577             | -2.97       | 169.01297(8), 275.02003(18), 276.02319(3), <b>300.99915(100)</b> , 302.00128(18), 463.05188(10), 481.06299(11), 633.07577(16)                                                                                         |
| 13                                    | 6.80      | Trigalloyl-hexoside           | C <sub>27</sub> H <sub>23</sub> O <sub>18</sub> <sup>-</sup> | 635.08840       | 635.09260             | -4.20       | 125.02319(5), <b>169.01359(33)</b> , 170.01952(3), 193.01332(3), 211.02546(3), 223.02472(2), <b>313.05705(31)</b> , <b>465.06726(100)</b> , 466.07048(30), 467.07544(6), 483.07466(5), 635.08707(2)                   |
| 14                                    | 8.15      | Digalloyl-HHDP-protoquercitol | C <sub>34</sub> H <sub>27</sub> O <sub>21</sub> <sup>+</sup> | 771.10450       | 771.10856             | -4.06       | <b>125.02395(2)</b> , 127.03941(4), <b>153.01948(100)</b> , 154.02237(10), 233.04528(2), 279.05108(3), 305.02931(1)                                                                                                   |
| 15                                    | 7.55      | Tetragalloyl-hexoside         | C <sub>34</sub> H <sub>27</sub> O <sub>22</sub> <sup>-</sup> | 787.09940       | 787.10066             | -1.26       | 125.02408(4), <b>169.01365(35)</b> , 295.04601(11), <b>313.05651(5)</b> , 447.05715(10), 465.06804(24), <b>617.07864(45)</b> , 618.08311(16), 635.08994(35), 636.09267(11), <b>787.10066(100)</b> , 788.10351(47)     |
| 16                                    | 7.95      | Pentagalloyl-hexoside         | C <sub>41</sub> H <sub>31</sub> O <sub>26</sub> <sup>-</sup> | 939.11040       | 939.11237             | -1.97       | <b>169.01396(12)</b> , 431.06149(5), 447.05781(6), 599.06893(5), 601.08286(5), 617.0801(15), <b>769.09121(78)</b> , 770.09408(35), 787.10071(9), <b>939.11237(100)</b> , 940.1152(57)                                 |
| <i>Ellagic acid and derivatives</i>   |           |                               |                                                              |                 |                       |             |                                                                                                                                                                                                                       |
| 17                                    | 7.68      | Ellagic acid                  | C <sub>14</sub> H <sub>5</sub> O <sub>8</sub> <sup>-</sup>   | 300.99840       | 301.00097             | -2.57       | 125.02388(6), 145.02898(9), 157.02928(4), 173.02432(9), 185.02407(11), 201.01864(12), 217.01543(4), 226.99896(5), 229.01379(18), 245.00886(11), 257.00902(7), 283.99642(18), 299.9908(18), <b>300.99841(100)</b>      |
| 18                                    | 8.42      | Methyl ellagic acid           | C <sub>15</sub> H <sub>7</sub> O <sub>8</sub> <sup>-</sup>   | 315.01410       | 315.01710             | -3.00       | 216.0064(5), 228.00601(1), 298.98408(1), <b>299.99116(100)</b> , 300.99505(18)                                                                                                                                        |
| 19                                    | 9.57      | Dimethyl ellagic acid         | C <sub>16</sub> H <sub>9</sub> O <sub>8</sub> <sup>-</sup>   | 329.02970       | 329.03194             | -2.24       | 270.98904(73), 271.99193(12), 283.99568(1), 285.00451(2), <b>298.98302(100)</b> , <b>299.98723(18)</b> , 300.98859(3), <b>314.00732(17)</b> , 315.01067(3)                                                            |
| 20                                    | 10.8<br>5 | Trimethyl ellagic acid        | C <sub>17</sub> H <sub>11</sub> O <sub>8</sub> <sup>-</sup>  | 343.04540       | 343.04668             | -1.28       | 269.9802(17), 270.98487(2), 285.00418(22), 286.0079(4), <b>297.97598(65)</b> , 298.97948(13), 299.98374(2), <b>312.99909(100)</b> , 314.00247(19), 315.00438(3), <b>328.02256(10)</b> , 329.0265(2)                   |
| 21                                    | 6.87      | Ellagic acid hexoside         | C <sub>20</sub> H <sub>15</sub> O <sub>13</sub> <sup>-</sup> | 463.05130       | 463.05601             | -4.71       | 299.99183(70), <b>300.99829(100)</b> , 302.00177(17), 463.05277(14)                                                                                                                                                   |
| 22                                    | 7.55      | Methyl ellagic acid hexoside  | C <sub>21</sub> H <sub>17</sub> O <sub>13</sub> <sup>-</sup> | 477.06690       | 477.07058             | -3.68       | 121.02928(15), 137.0228(2), 245.08164(3), 270.98938(3), 289.071(12), 298.98325(14), <b>299.99098(43)</b> , 300.99478(10), 314.00647(22), <b>315.01462(100)</b> , 316.01712(19), 317.01938(3), 477.06888(11)           |

|                                               |      |                                      |                                                              |           |           |       |                                                                                                                                                                                                                                                  |
|-----------------------------------------------|------|--------------------------------------|--------------------------------------------------------------|-----------|-----------|-------|--------------------------------------------------------------------------------------------------------------------------------------------------------------------------------------------------------------------------------------------------|
| <i>Other phenolic acid and its glycosides</i> |      |                                      |                                                              |           |           |       |                                                                                                                                                                                                                                                  |
| 23                                            | 3.09 | Hydroxybenzoic acid                  | C <sub>7</sub> H <sub>5</sub> O <sub>3</sub> <sup>-</sup>    | 137.02390 | 137.02422 | -0.32 | /                                                                                                                                                                                                                                                |
| 24                                            | 1.88 | Dihydroxybenzoic acid isomer I       | C <sub>7</sub> H <sub>5</sub> O <sub>4</sub> <sup>-</sup>    | 153.01880 | 153.01946 | -0.66 | 107.01064(10), <b>108.01956(100)</b> , 109.02881(82)                                                                                                                                                                                             |
| 25                                            | 5.12 | Dihydroxybenzoic acid isomer II      | C <sub>7</sub> H <sub>5</sub> O <sub>4</sub> <sup>-</sup>    | 153.01880 | 153.01911 | -0.31 | <b>107.0123(100)</b> , 109.02803(17)                                                                                                                                                                                                             |
| 26                                            | 2.36 | Dihydroxybenzoic acid hexoside       | C <sub>13</sub> H <sub>15</sub> O <sub>9</sub> <sup>-</sup>  | 315.07160 | 315.07520 | -3.60 | 108.02123(13), <b>109.02917(100)</b> , 110.03293(7), 152.01062(21), <b>153.0189(57)</b> , 315.0696(2)                                                                                                                                            |
| 27                                            | 2.96 | Vanillic acid hexoside               | C <sub>14</sub> H <sub>17</sub> O <sub>9</sub> <sup>-</sup>  | 329.08730 | 329.08958 | -2.28 | 107.01288(9), 108.02132(16), 121.02787(18), 122.03681(20), <b>123.04492(100)</b> , 151.0045(19), 152.01052(23), 166.02598(19), <b>167.03379(49)</b>                                                                                              |
| <i>Flavonoids and derivatives</i>             |      |                                      |                                                              |           |           |       |                                                                                                                                                                                                                                                  |
| <i>Flavan-3-ols and procyanidins</i>          |      |                                      |                                                              |           |           |       |                                                                                                                                                                                                                                                  |
| 28                                            | 5.29 | Catechin                             | C <sub>15</sub> H <sub>13</sub> O <sub>6</sub> <sup>-</sup>  | 289.07120 | 289.07260 | -1.40 | 109.02935(99), 121.02937(29), <b>123.04498(100)</b> , 125.02435(44), 137.02437(26), 138.03108(11), 149.02482(16), 151.03982(31), 159.04507(11), 161.0587(15), 164.01307(12), 187.04006(12), 203.07071(21), 221.08194(13)                         |
| 29                                            | 6.63 | Epicatechin                          | C <sub>15</sub> H <sub>13</sub> O <sub>6</sub> <sup>-</sup>  | 289.07120 | 289.07259 | -1.39 | 109.02954(94), 121.02973(28), 122.03668(17), <b>123.04502(100)</b> , 125.02442(41), 137.02444(30), 149.025(15), 151.03999(32), 159.04542(11), 161.05922(14), 164.01304(13), 187.03949(11), 188.04753(11), 203.07075(21), 221.08248(13)           |
| 30                                            | 6.54 | Methyl epigallocatechin              | C <sub>16</sub> H <sub>15</sub> O <sub>7</sub> <sup>-</sup>  | 319.08180 | 319.08293 | -1.13 | 121.02877(19), <b>125.02406(100)</b> , 126.0278(9), 137.02401(16), 149.02384(5), 161.02384(32), 162.02964(9), 164.01128(46), 165.01799(25), 175.04116(3), 203.03594(3)                                                                           |
| 31                                            | 7.68 | Epicatechin-gallate                  | C <sub>22</sub> H <sub>17</sub> O <sub>10</sub> <sup>-</sup> | 441.08220 | 441.08941 | -7.21 | 109.02933(6), 124.01656(12), 125.02396(47), 137.02411(7), 151.0386(7), <b>169.01398(100)</b> , 179.03487(4), 193.01296(4), 203.07093(7), 205.05023(8), 245.08159(16), <b>289.07096(26)</b> , 290.07692(4)                                        |
| 32                                            | 4.18 | Catechin hexoside                    | C <sub>21</sub> H <sub>23</sub> O <sub>11</sub> <sup>-</sup> | 451.12400 | 451.12584 | -1.84 | 109.02893(13), 123.04501(8), 125.02392(17), 137.02506(11), 149.02424(6), 151.04064(9), 165.01992(7), 179.03456(11), 203.07116(17), 221.08245(4), 245.08188(47), <b>289.07176(100)</b> , 290.0749(20)                                             |
| 33                                            | 5.73 | Epicatechin-hexoside                 | C <sub>21</sub> H <sub>25</sub> O <sub>11</sub> <sup>+</sup> | 453.13970 | 453.14384 | -4.14 | 123.04507(47), 124.04734(5), 127.03965(3), <b>139.04014(100)</b> , 147.04498(15), 151.04276(2), 163.04196(3), 165.0554(19), 179.07106(2), 207.06507(9), 273.07562(3), <b>291.08474(3)</b>                                                        |
| 34                                            | 4.51 | B type procyanidin dimer isomer I    | C <sub>30</sub> H <sub>25</sub> O <sub>12</sub> <sup>-</sup> | 577.13515 | 577.13795 | -2.80 | 125.02456(61), 161.02495(20), 245.07988(22), <b>289.07221(100)</b> , 339.08737(9), 407.07872(69)                                                                                                                                                 |
| 35                                            | 6.33 | B type procyanidin dimer isomer II   | C <sub>30</sub> H <sub>25</sub> O <sub>12</sub> <sup>-</sup> | 577.13515 | 577.13723 | -2.08 | 125.02419(69), 161.02427(21), 245.08000(24), <b>289.07174(100)</b> , 339.08743(9), 407.07850(82)                                                                                                                                                 |
| 36                                            | 6.63 | Chalcan flavan-3-ols dimer isomer II | C <sub>30</sub> H <sub>27</sub> O <sub>12</sub> <sup>-</sup> | 579.15030 | 579.15511 | -4.81 | 109.02957(7), 123.04512(4), 125.02411(9), 137.02398(7), 179.03478(9), 203.07122(10), 205.05053(10), 245.08177(34), 246.08548(6), 249.08046(11), <b>289.07228(100)</b> , 290.0755(19)                                                             |
| 37                                            | 5.29 | Chalcan flavan-3-ol dimer isomer I   | C <sub>30</sub> H <sub>27</sub> O <sub>12</sub> <sup>-</sup> | 579.15030 | 579.15287 | -2.57 | 109.02947(6), 123.04492(3), 125.02454(9), 137.02442(6), 151.03967(4), 161.05986(2), 165.01921(4), 179.03486(8), 203.07166(9), 205.05112(9), 245.08274(32), <b>289.07199(100)</b> , 290.07574(19)                                                 |
| 38                                            | 6.19 | Methyl B type prodelphinidin         | C <sub>31</sub> H <sub>27</sub> O <sub>13</sub> <sup>-</sup> | 607.14572 | 607.14904 | -3.33 | <b>125.02417(100)</b> , 161.02352(28), 243.03135(27), 261.03951(13), <b>287.05543(33)</b> , 405.06185(11)                                                                                                                                        |
| 39                                            | 6.02 | Procyanidin trimer B type isomer I   | C <sub>45</sub> H <sub>37</sub> O <sub>18</sub> <sup>-</sup> | 865.19800 | 865.19890 | -0.90 | 125.02426(79), 243.03073(23), <b>287.05641(100)</b> , 289.07077(69), 407.07849(70), 413.08807(32), 425.08796(46), 449.08803(26), 451.10294(33), 575.11956(34), <b>577.13507(58)</b> , 695.1413(43), 713.15203(24), 865.1989(35), 866.20364(24)   |
| 40                                            | 6.93 | Procyanidin trimer B type isomer II  | C <sub>45</sub> H <sub>37</sub> O <sub>18</sub> <sup>-</sup> | 865.19800 | 865.19733 | 0.67  | 125.02404(99), 161.02504(26), <b>287.05528(100)</b> , 289.07164(66), 407.07683(77), 413.08747(39), 425.08753(58), 449.08883(29), 451.10247(39), 575.11963(44), <b>577.13561(58)</b> , 695.14215(38), 713.14768(31), 865.19733(32), 866.20019(27) |
| <i>Other detected flavonoids</i>              |      |                                      |                                                              |           |           |       |                                                                                                                                                                                                                                                  |
| 41                                            | 10.1 | Kaempferol                           | C <sub>15</sub> H <sub>9</sub> O <sub>6</sub> <sup>-</sup>   | 285.03990 | 285.04097 | -1.07 | 107.01327(8), 143.05034(7), 145.03047(7), 151.00397(5), 157.06081(6), 159.04471(13), 185.06073(13), 187.0395(11), 211.04083(7), 214.02871(6), 229.05056(11), 239.03424(9), <b>285.03994(100)</b> , 286.04366(21)                                 |
| 42                                            | 9.91 | Naringenin                           | C <sub>15</sub> H <sub>11</sub> O <sub>5</sub> <sup>-</sup>  | 271.06060 | 271.06201 | -1.41 | 107.01443(26), <b>119.0502(100)</b> , 123.0446(38), 125.02393(7), <b>151.00323(30)</b> , 152.00829(3), 161.05956(3), 165.01893(3), 167.03416(18), 177.01894(4), 185.0627(2), 187.0508(3), 189.05406(7)                                           |

|                               |      |                                 |                                                              |           |           |       |                                                                                                                                                                                                                                          |
|-------------------------------|------|---------------------------------|--------------------------------------------------------------|-----------|-----------|-------|------------------------------------------------------------------------------------------------------------------------------------------------------------------------------------------------------------------------------------------|
| 43                            | 8.49 | Phloridzin                      | C <sub>21</sub> H <sub>23</sub> O <sub>10</sub> <sup>-</sup> | 435.12910 | 435.12768 | 1.42  | 119.0504(4), 123.04442(12), 125.02413(17), <b>167.03483(100)</b> , 168.0311(13), 179.03475(12), <b>273.07683(60)</b> , 274.07959(12)                                                                                                     |
| <i>Peonia root terpenoids</i> |      |                                 |                                                              |           |           |       |                                                                                                                                                                                                                                          |
| 44                            | 9.97 | Nor-paeonilactone               | C <sub>9</sub> H <sub>15</sub> O <sub>2</sub> <sup>+</sup>   | 155.10720 | 155.10880 | -1.60 | 103.05831(35), 105.06789(21), 107.08606(29), 110.98355(21), 111.04547(28), 115.05664(71), 116.97745(87), 127.05882(41), <b>128.06025(100)</b> , 129.07032(34), 131.07962(24), 144.09357(22), 156.07957(20), 157.07408(22), 158.09685(25) |
| 45                            | 6.40 | Paeoveitol D                    | C <sub>10</sub> H <sub>11</sub> O <sub>3</sub> <sup>+</sup>  | 179.07080 | 179.07217 | -1.37 | <b>103.05503(100)</b> , 105.03189(10), <b>105.07108(82)</b> , 106.07323(22), 107.05239(28), 108.05868(26), 115.05622(12), 117.06879(14), 118.04748(20), 121.06358(13), 123.0432(17), 133.06625(15), 137.06064(14), 147.07017(11)         |
| 46                            | 6.93 | Paeonisoethujone                | C <sub>10</sub> H <sub>15</sub> O <sub>3</sub> <sup>+</sup>  | 183.10210 | 183.10219 | -0.09 | 103.05502(35), 104.06195(21), 105.07028(23), 107.04943(11), 109.06526(14), 113.06101(18), 115.05534(20), 117.07058(64), 118.07414(10), <b>119.08661(100)</b> , 120.09063(12), 121.06599(21), 132.05737(20), 147.08113(11)                |
| 47                            | 6.60 | Paeonilactone B                 | C <sub>10</sub> H <sub>13</sub> O <sub>4</sub> <sup>+</sup>  | 197.08140 | 197.08347 | -2.07 | 108.02146(35), 119.04954(4), 123.04508(80), 124.04883(7), 136.01797(4), <b>151.03983(100)</b> , 152.04355(12)                                                                                                                            |
| 48                            | 3.50 | Paeonilactone A                 | C <sub>10</sub> H <sub>15</sub> O <sub>4</sub> <sup>+</sup>  | 199.09700 | 199.09852 | -1.52 | 105.07061(46), <b>107.05018(100)</b> , 108.05485(14), 109.06747(21), 111.083(12), 115.05495(57), 117.06995(65), 119.08594(15), 123.08093(10), 125.0969(10), 135.08133(94)                                                                |
| 49                            | 2.62 | 9-Hydroxypaeonilactone A        | C <sub>10</sub> H <sub>15</sub> O <sub>5</sub> <sup>+</sup>  | 215.09190 | 215.09411 | -2.21 | 109.06581(83), 110.06978(10), 125.06083(6), 126.09247(6), <b>127.07618(100)</b> , 128.07962(11), 137.06052(32), 138.06538(4), 155.07111(47), 172.07668(6), 198.11391(4)                                                                  |
| 50                            | 10.3 | Paeoniflorigenone               | C <sub>17</sub> H <sub>19</sub> O <sub>6</sub> <sup>+</sup>  | 319.11762 | 319.12118 | -3.57 | <b>105.03426(100)</b> , 133.06563(10), 137.06054(18), 151.07599(11), 179.07131(19)                                                                                                                                                       |
| 51                            | 5.82 | Oxypaeoniflorin                 | C <sub>23</sub> H <sub>27</sub> O <sub>12</sub> <sup>-</sup> | 495.15030 | 495.15174 | -1.44 | <b>137.024(100)</b> , 138.02759(8), 151.041(2), 165.05549(7), 177.05571(5), 195.06596(4), 281.06702(4), 333.09801(3), 345.11916(2), 465.14178(3), 495.15188(9)                                                                           |
| 52                            | 8.90 | Mudanpioside D                  | C <sub>24</sub> H <sub>29</sub> O <sub>12</sub> <sup>-</sup> | 509.16590 | 509.17478 | -8.88 | <b>121.02881(100)</b> , 122.03155(13), 123.04305(6), 152.0098(7), 153.00127(6), 167.03275(14), 169.01321(9), 227.13876(6), 333.02808(8), 347.17663(9), 465.20628(7), 509.17994(6)                                                        |
| 53                            | 7.07 | Paeoniflorin+HCOOH              | C <sub>24</sub> H <sub>29</sub> O <sub>13</sub> <sup>-</sup> | 525.16080 | 525.16398 | -3.18 | 113.02443(4), <b>121.02931(100)</b> , 122.0331(9), 165.05583(10), 177.05564(2), 327.10898(4)                                                                                                                                             |
| 54                            | 7.75 | Albiflorin+HCOOH                | C <sub>24</sub> H <sub>29</sub> O <sub>13</sub> <sup>-</sup> | 525.16080 | 525.16361 | -2.81 | 113.02422(4), <b>121.02911(100)</b> , 122.03275(9), 165.05557(9), 177.05555(2), 327.10913(3)                                                                                                                                             |
| 55                            | 2.59 | Galloyl desbenzoyl paeoniflorin | C <sub>23</sub> H <sub>27</sub> O <sub>14</sub> <sup>-</sup> | 527.14010 | 527.14182 | -1.72 | 123.0082(5), 124.01619(7), 125.02411(7), 151.00367(7), 165.055(13), 168.00677(5), 169.01362(67), 271.09703(6), 279.05119(7), 313.0562(15), 497.128(13), <b>527.14182(100)</b> , 528.14457(32)                                            |
| 56                            | 10.1 | Benzoyl paeoniflorin            | C <sub>30</sub> H <sub>33</sub> O <sub>12</sub> <sup>+</sup> | 585.19720 | 585.20263 | -5.43 | <b>105.03473(100)</b> , 106.0376(10), 109.02798(5), 121.06425(3), 123.04621(5), 127.04(4), 133.06555(9), 151.07716(10), 153.01581(3), 161.05998(3), 179.06945(4), 197.08179(9), 249.07663(10), 267.08642(3)                              |
| 57                            | 9.91 | Mudanpioside J                  | C <sub>31</sub> H <sub>33</sub> O <sub>14</sub> <sup>-</sup> | 629.18700 | 629.19505 | -8.05 | <b>121.02932(100)</b> , 122.0328(9), 135.04493(2), 165.05529(5), 177.05463(2), 431.13521(1)                                                                                                                                              |
| 58                            | 7.87 | Galloyl-paeoniflorin            | C <sub>30</sub> H <sub>31</sub> O <sub>15</sub> <sup>-</sup> | 631.16684 | 631.16919 | -2.34 | 169.01421(34), 271.04647(59), 313.05735(62), 491.12065(45), 613.15807(59), <b>631.16841(100)</b>                                                                                                                                         |
